# Supplementary material
Source: Springer Nature journal article supplement (https://www.springermedizin.de/resource/supplementary/12881_2008_388_MOESM1_ESM.pdf/9453060)

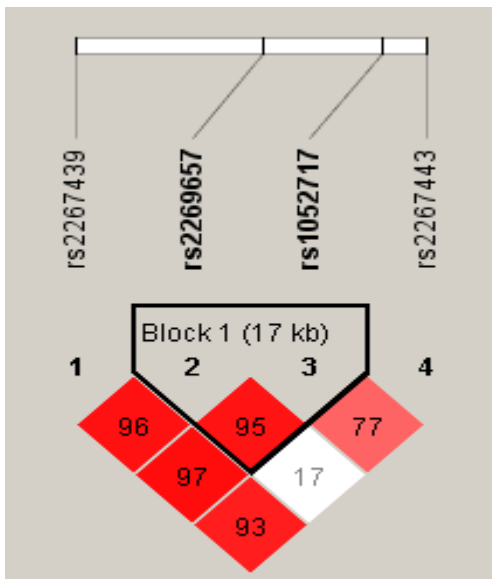

| SNPs      | D'        |           |           |           |
|-----------|-----------|-----------|-----------|-----------|
|           | rs2267439 | rs2269657 | rs1052717 | rs2267443 |
| rs2267439 |           | 0.961     | 0.971     | 0.933     |
| rs2269657 | 0.238     |           | 0.956     | 0.173     |
| rs1052717 | 0.318     | 0.149     |           | 0.774     |
| rs2267443 | 0.362     | 0.006     | 0.494     |           |

| Haplotype |           |   | Frequency |
|-----------|-----------|---|-----------|
| rs2269657 | rs1052717 |   |           |
| ht 1      | G         | G | 0.427     |
| ht 2      | G         | A | 0.313     |
| ht 3      | T         | G | 0.257     |

Supplement: MOESM1 [file 9453060]
